# Supplementary material for: Trichostatin A Rescues the Disrupted Imprinting Induced by Somatic Cell Nuclear Transfer in Pigs
Source: PubMed Central journal article supplement (PMC4427324; doi:10.1371/journal.pone.0126607), 2015-05-11
Supplement: pone.0126607.s005.pdf [file pone.0126607.s005.pdf]

**S1 Table. Detail of primers for bisulfite sequencing and quantitative real time PCR.**

| <b>Gene</b>                          | <b>Primer sequence (5'-3')</b> | <b>Length<br/>(bp)</b> | <b>Accession<br/>number</b> |
|--------------------------------------|--------------------------------|------------------------|-----------------------------|
| <b>Bisulfite sequencing analysis</b> |                                |                        |                             |
|                                      | Outer                          |                        |                             |
| <b>H19/Igf2</b>                      | F:GGTTTTAGGGGATATTTTT          | 384                    | AY044827                    |
|                                      | R:TTAAAAAACATTACTTCCATATAC     |                        |                             |
|                                      | Inner                          |                        |                             |
|                                      | F:GATTTTTAGGTTTGTATTATTT       | 208                    |                             |
|                                      | R:CAAATATCAATAAAAAAACCC        |                        |                             |
| <b>Gene expression analysis</b>      |                                |                        |                             |
| <b>Igf2</b>                          | F:CCGTGGCATCGTGGAAGAGTG        | 170                    | NM_213883                   |
|                                      | R:TCCAGGTGTCATAGCGGAAGAAC      |                        |                             |
| <b>H19</b>                           | F: TCAAACGACAAGAGATGGTGCTA     | 118                    | AY044827                    |
|                                      | R: CAAGTAGTGTAGTGGCTCCAGAATG   |                        |                             |
| <b>Hat1</b>                          | F: GACTGTGTGGAGGCAGATGATGTA    | 150                    | XM_005671969                |
|                                      | R:GAGAACCGAGTATGTATGGAGTAAGG   |                        |                             |
| <b>Hdac1</b>                         | F: GCTGGCAAAGGCAAGTATTATG      | 139                    | XM_005665200                |
|                                      | R: CACACTGTAAGACGACCGCAC       |                        |                             |
| <b>Dnmt1</b>                         | F:GCGTCTTGCAGGCTGGTCAGTA       | 152                    | NM_001032355                |
|                                      | R:CTTCTTATCATCGACCACGACGCT     |                        |                             |
| <b>Dnmt3a</b>                        | F:ATGTGGTTCGGAGACGGCAAGT       | 195                    | NM_001097437                |
|                                      | R:GCTCTCGTCGTTGTCATGGCA        |                        |                             |
| <b>β2m</b>                           | F:CTTCTACCTTCTGGTCCCACTG       | 116                    | NM_213978                   |

R:GTGGTCTCGATCCCACTTAACTATC

**18s**

F:AATCTCGGGTGGCTGAACGC

143

NR\_002170

R:CCGTTCTTAGTTGGTGGAGCGAT

---
